# Supplementary material
Source: PubMed Central journal article supplement (PMC2424172)

**Supplementary Fig. S1, Datta et al.**

76N Bmi-1

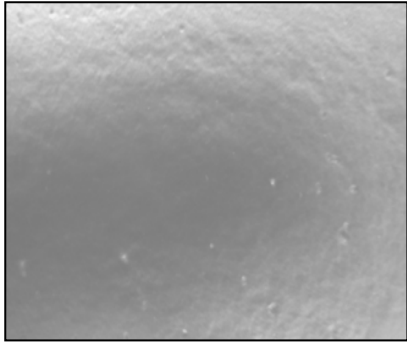

76N hTERT

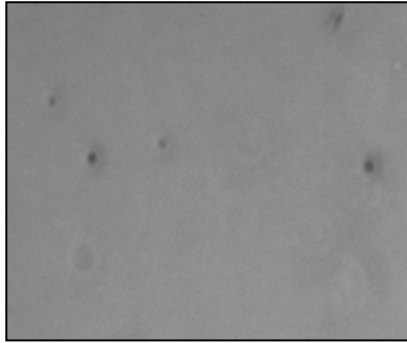

76N Bmi-1  
+ H-Ras

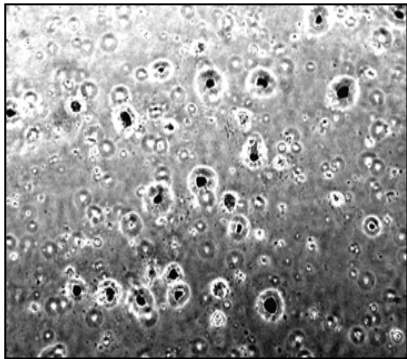

76N hTERT  
+ H-Ras

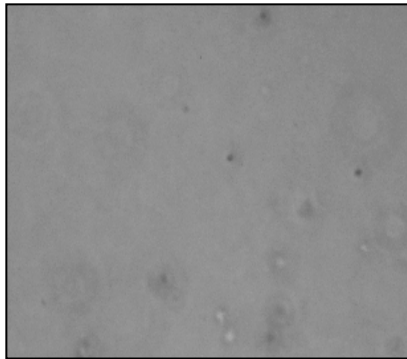

## Supplementary Fig. S2, Datta et al.

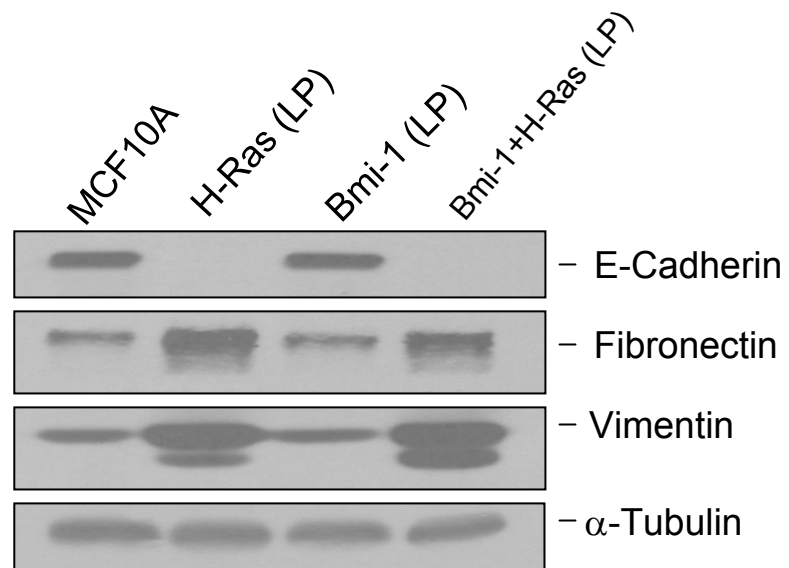

**Supplementary Fig. S3, Datta et al.**

H-Ras

H-Ras+Bmi-1

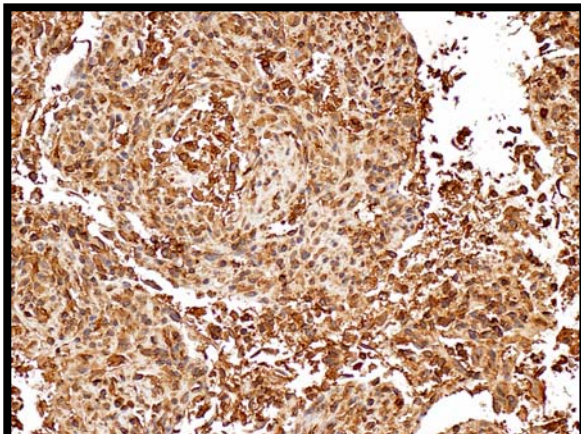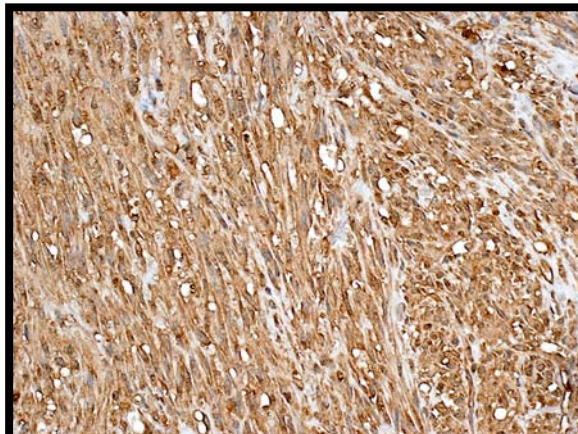

Vimentin  
20X

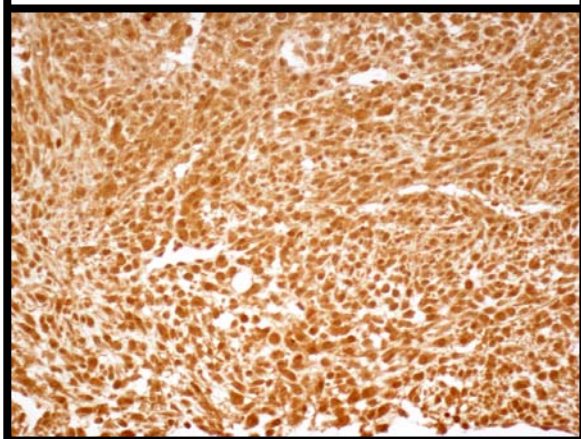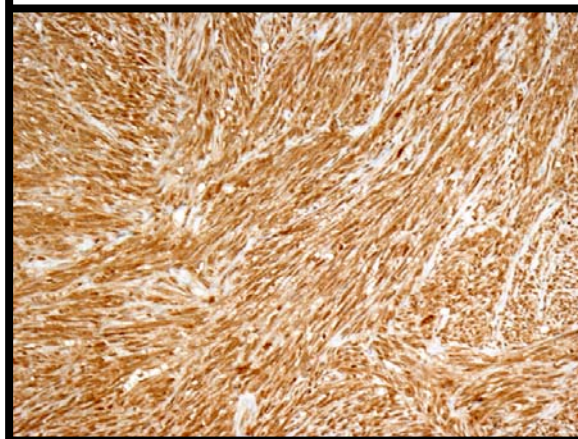

CK18  
20X

# Supplementary Fig. S4, Datta et al.

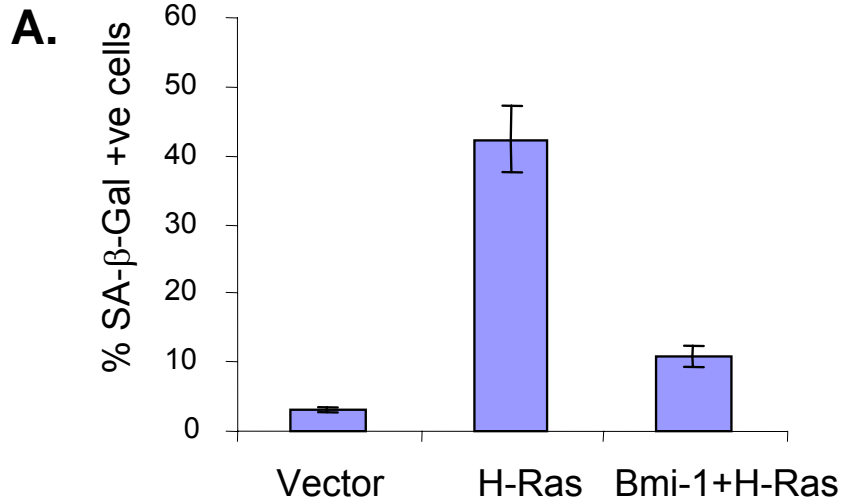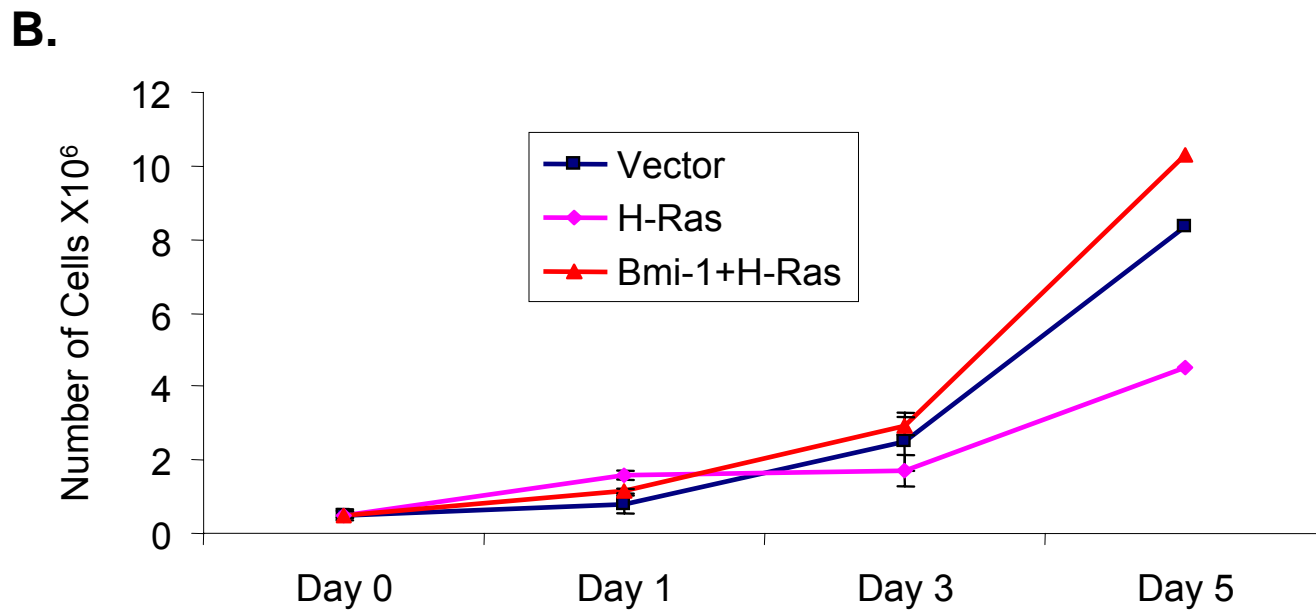

# Supplementary Fig. S5, Datta et al.

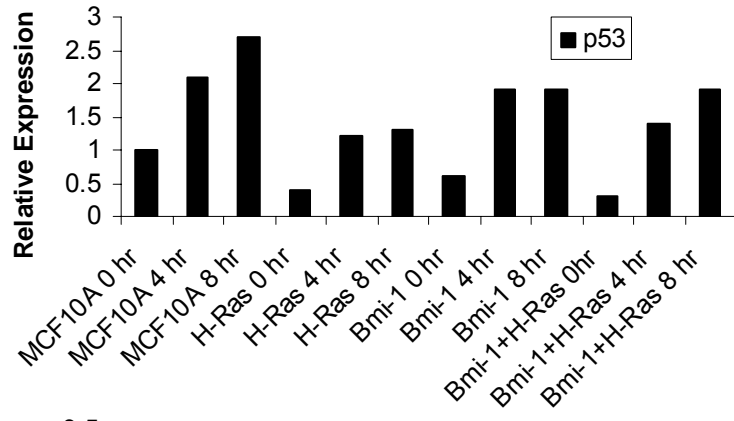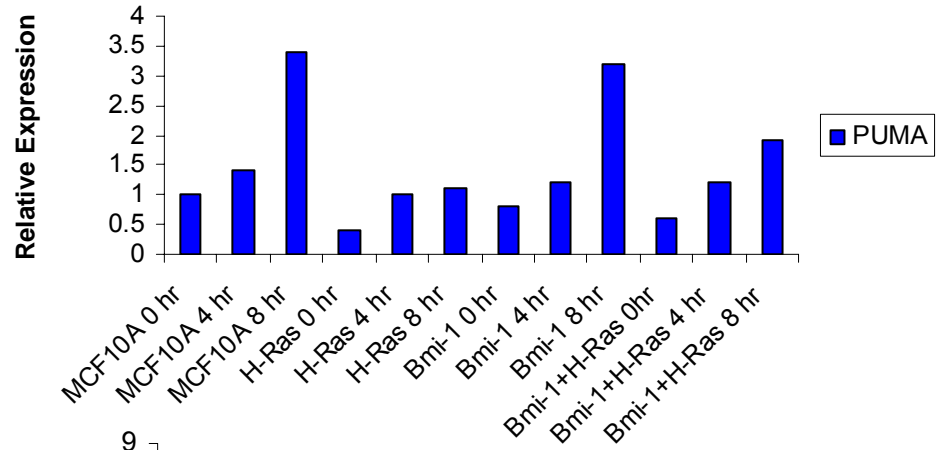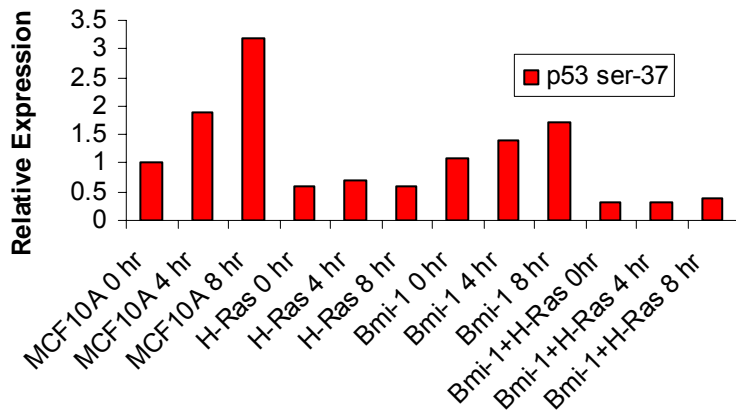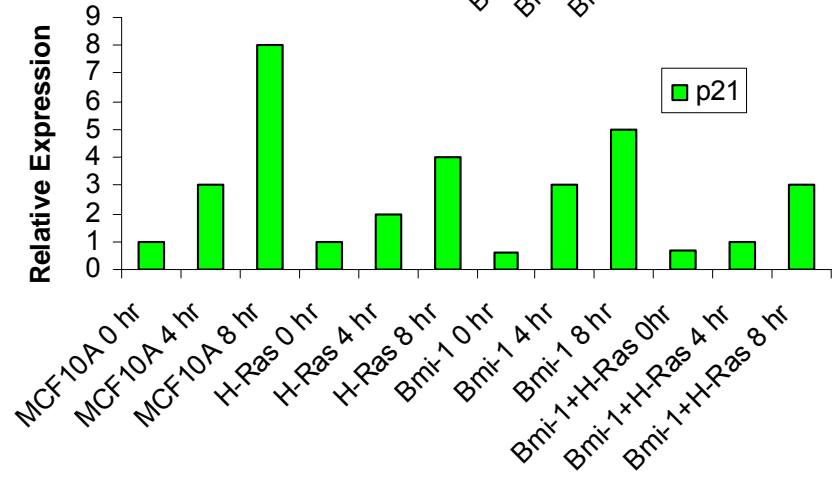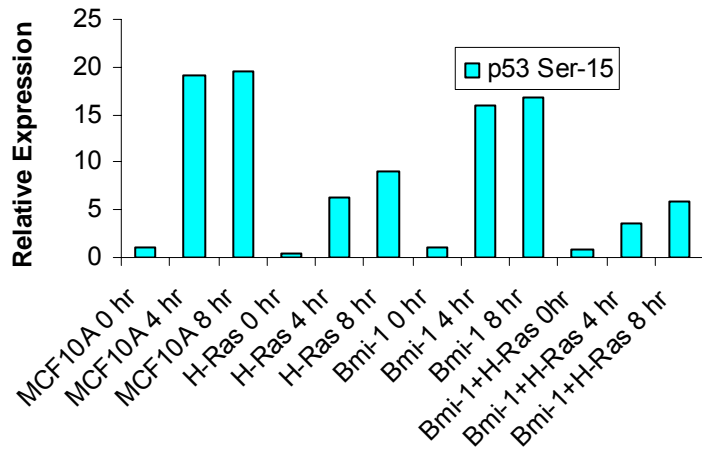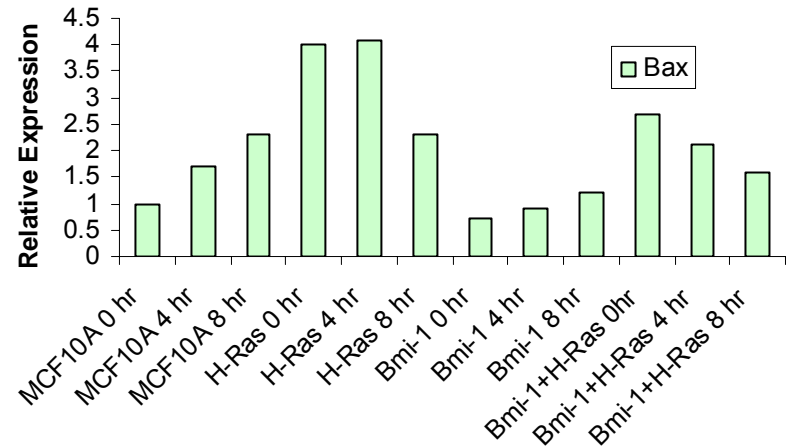

# Supplementary Fig. S6, Datta et al.

**A.**

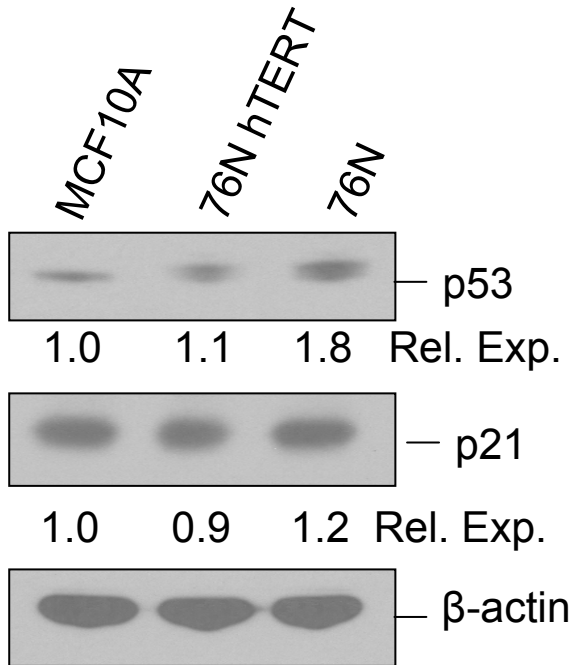

**B.**

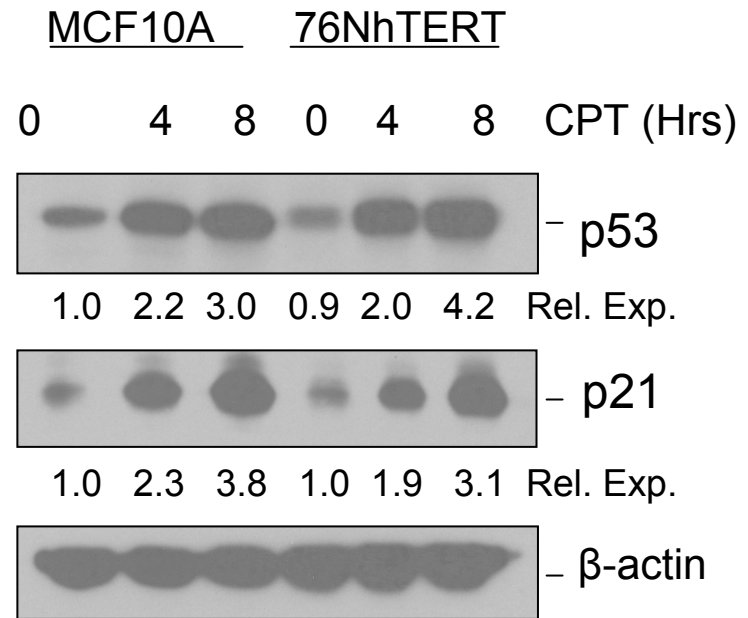

Supplement: NIHMS48203-supplement-Supp_Data.pdf [file NIHMS48203-supplement-Supp_Data.pdf]
